# Supplementary material for: Hierarchical porous activated carbon in OER with high efficiency
Source: Royal Society of Chemistry journal article supplement (doi:10.1039/c6ra19333a), 2016-01-01
Supplement: c6ra19333a1.pdf [file c6ra19333a1.pdf]

Supporting information

Table s1 . The physical properties deduced from the Nitrogen adsorption-desorption isotherm.

| samples | $S_{\text{BET}}$<br>( $\text{m}^2/\text{g}$ ) | $S_{\text{micro}}$<br>( $\text{m}^2/\text{g}$ ) | $S_{\text{meso}}$<br>( $\text{m}^2/\text{g}$ ) | $S_{\text{micro}}/S_{\text{meso}}$ | $V_{\text{total}}$<br>( $\text{cc}/\text{g}$ ) | Average pore<br>size (nm) |
|---------|-----------------------------------------------|-------------------------------------------------|------------------------------------------------|------------------------------------|------------------------------------------------|---------------------------|
| MAC     | 1078                                          | 641                                             | 437                                            | 1.46                               | 0.847                                          | 3.143                     |
| CAC     | 1003                                          | 724                                             | 279                                            | 2.59                               | 0.651                                          | 2.596                     |
| PAC     | 824                                           | 421                                             | 403                                            | 1.04                               | 0.612                                          | 2.974                     |
| AC      | 1912                                          | 1219                                            | 693                                            | 1.76                               | 1.193                                          | 2.496                     |

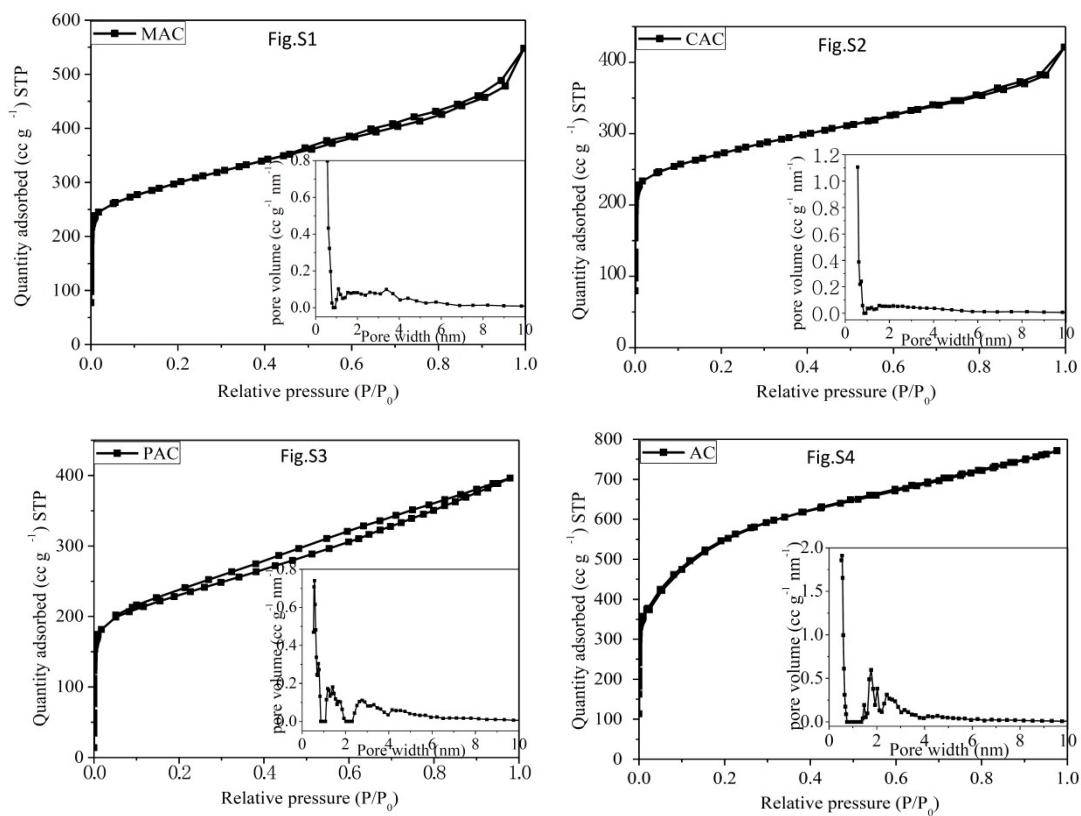

Fig.s1-4 Nitrogen adsorption-desorption isotherm of samples and (insets) pore size distribution calculated from DFT model.

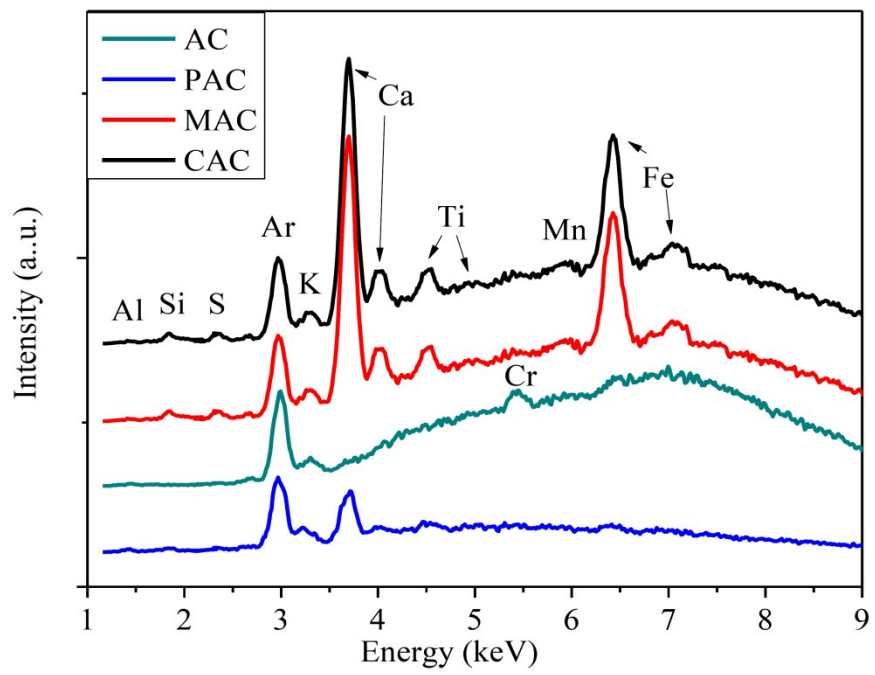

Fig.5 XRF curves of sample MAC, PAC, CAC and AC.

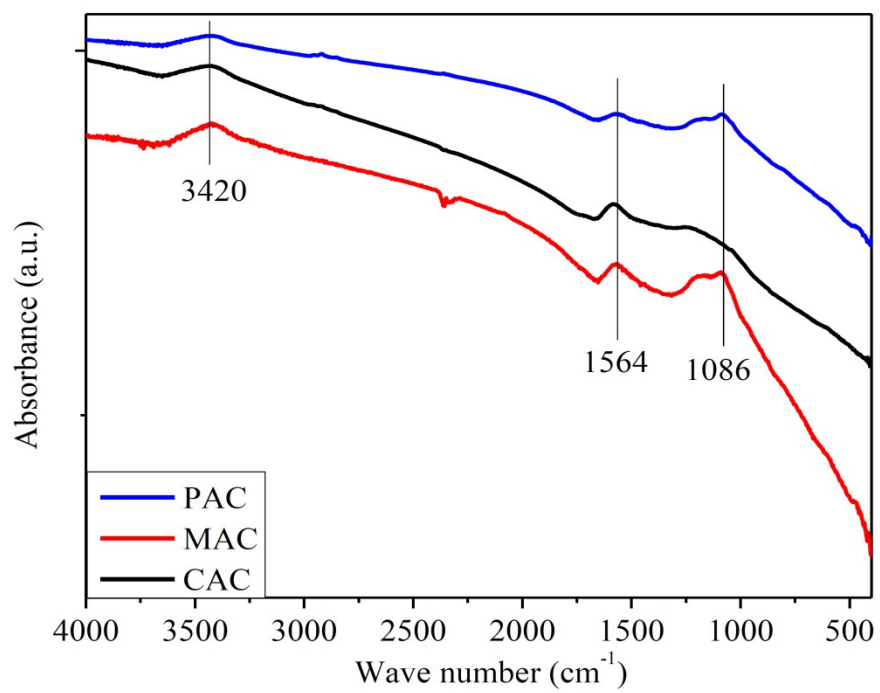

Fig.s6 FT-IR spectra of sample PAC, MAC and CAC.

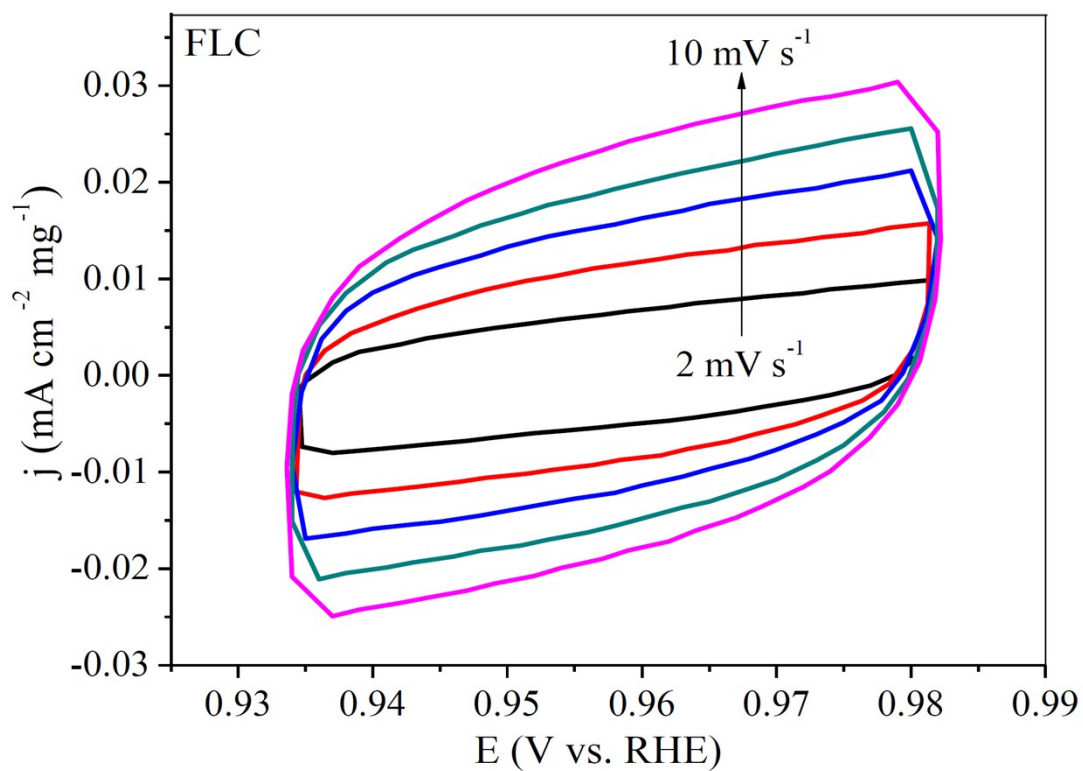

Fig.S7 CV curves of the FLC recorded at 0.93-0.99 V vs. RHE at various scan rates (2-10  $\text{mV s}^{-1}$ ).

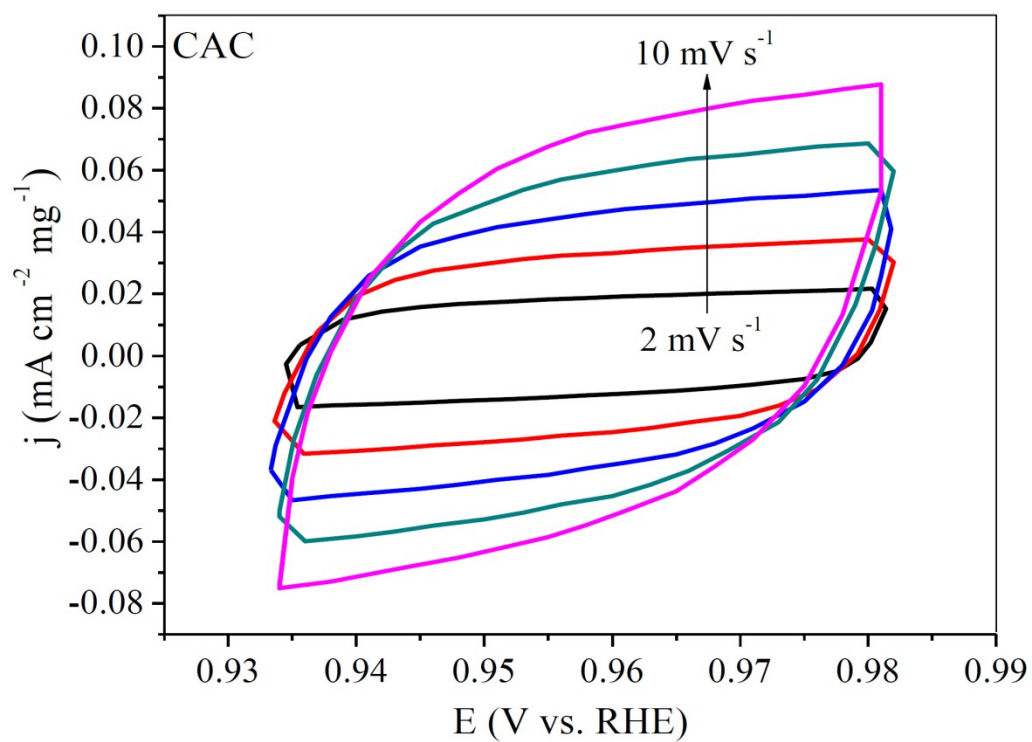

Fig.S8 CV curves of the CAC recorded at 0.93-0.99 V vs. RHE at various scan rates (2-10 mV s<sup>-1</sup>).

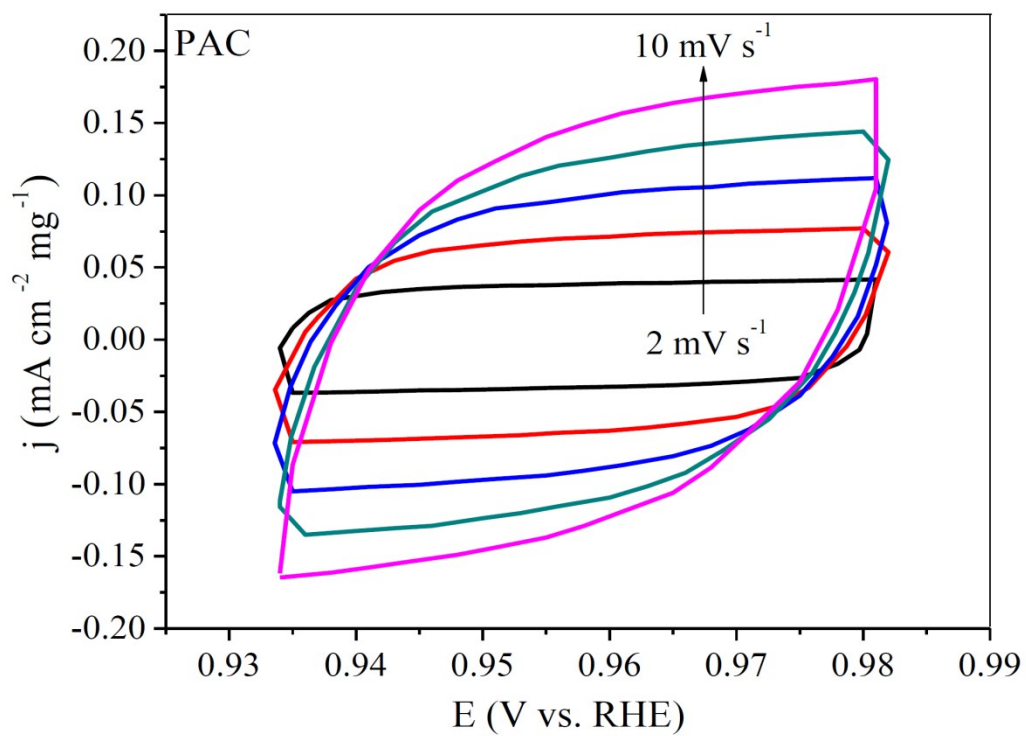

Fig.S9 CV curves of the PAC recorded at 0.93-0.99 V vs. RHE at various scan rates (2-10  $\text{mV s}^{-1}$ ).

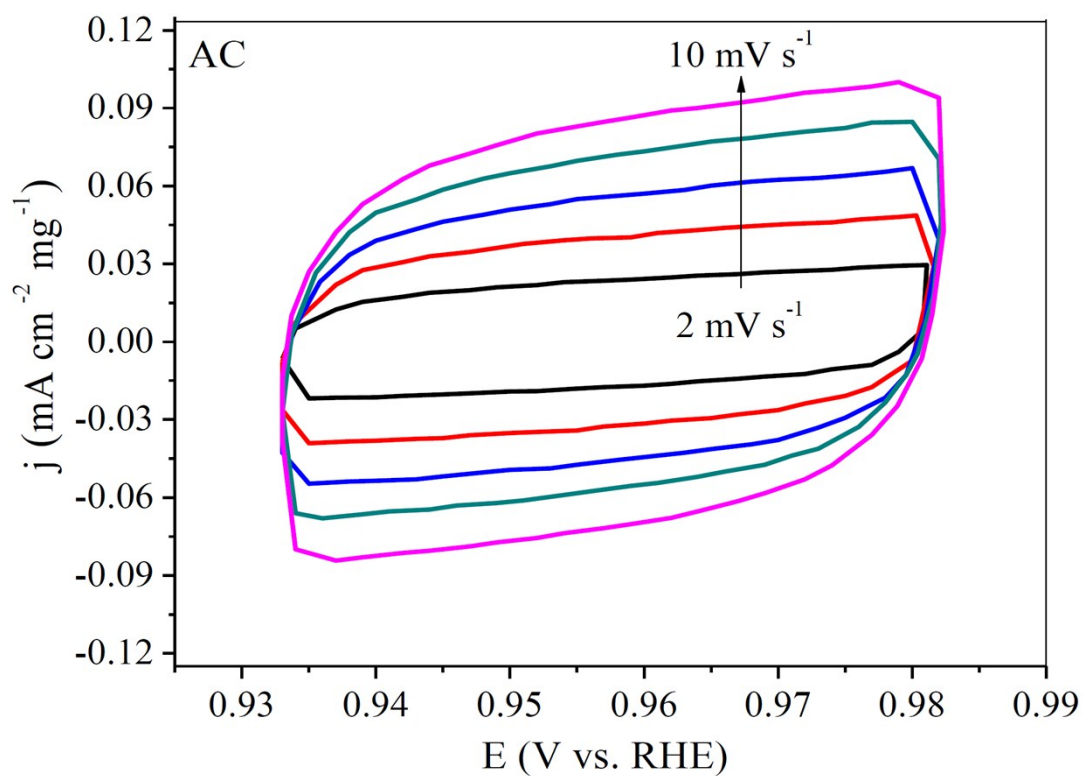

Fig.S10 CV curves of the AC, recorded at 0.93-0.99 V vs. RHE at various scan rates (2-10  $\text{mV s}^{-1}$ ).
